# Supplementary material for: Patients with left ventricular ejection fraction greater than 58 % have fewer incidences of future acute decompensated heart failure admission and all-cause mortality
Source: Springer Nature journal article supplement (doi:10.1007/s00380-015-0657-1), 2015-03-13
Supplement: MOESM1 [file 8344944]

**Supplementary Table S1** Comparisons of clinical characteristics and hemodynamic variables

| Characteristic                       | All patients | Without events* | With events | P     |
|--------------------------------------|--------------|-----------------|-------------|-------|
| Number                               | 144          | 135             | 9           |       |
| Male/female                          | 116/28       | 109/26          | 7/2         | 0.83  |
| Age (years)                          | 65.8 ± 8.7   | 65.5 ± 8.6      | 69.2 ± 9.7  | 0.22  |
| Height (cm)                          | 162.3 ± 8.1  | 162.3 ± 8.1     | 161.9 ± 7.8 | 0.90  |
| Weight (kg)                          | 63.9 ± 10.4  | 64.0 ± 10.6     | 62.4 ± 6.8  | 0.65  |
| Body surface area (m <sup>2</sup> )  | 1.71 ± 0.16  | 1.71 ± 0.17     | 1.68 ± 0.12 | 0.65  |
| Body mass index (kg/m <sup>2</sup> ) | 24.2 ± 3.3   | 24.3 ± 3.3      | 23.8 ± 2.3  | 0.70  |
| Heart rate (beats/min)               | 66.8 ± 10.7  | 66.7 ± 10.5     | 68.8 ± 13.6 | 0.57  |
| Mean blood pressure (mm Hg)          | 93.9 ± 14.1  | 93.7 ± 14.2     | 96.4 ± 12.8 | 0.58  |
| LVEF (%)                             | 62.4 ± 12.4  | 62.7 ± 12.6     | 57.5 ± 8.1  | 0.22  |
| LV end-diastolic pressure (mm Hg)    | 14.1 ± 5.0   | 13.9 ± 4.7      | 17.6 ± 7.3  | 0.03  |
| Tw (ms)                              | 46.0 ± 9.1   | 45.7 ± 9.0      | 50.6 ± 8.9  | 0.12  |
| Tp (ms)                              | 78.0 ± 27.0  | 76.9 ± 25.7     | 95.8 ± 39.0 | 0.04  |
| Lack of IS (%)                       | 25           | 22.2            | 66.7        | 0.003 |

Data represent mean ± standard deviation or frequency.

\*Events were defined as combined subsequent acute decompensated heart failure and cardiovascular death.

*LV* left ventricular, *LVEF* left ventricular ejection fraction, *T<sub>w</sub>* left ventricular relaxation time constant calculated by Weiss's method, *T<sub>p</sub>* left ventricular relaxation time constant calculated from phase loop, *IS* inertia stress

**Supplementary Table S2** Comparisons of clinical characteristics, underlying diseases, and medications

| Characteristic            | All patients      | Without events*     | With events         | P    |
|---------------------------|-------------------|---------------------|---------------------|------|
| Total cholesterol (mg/dL) | 187.5 ± 36.4      | 186.9 ± 36.1        | 195.2 ± 41.7        | 0.51 |
| Triglycerides (mg/dL)     | 125 [IQR, 90-189] | 128 [IQR, 90.5-193] | 110 [IQR, 80.8-147] | 0.21 |
| HDL cholesterol (mg/dL)   | 45.6 ± 13.1       | 45.3 ± 12.4         | 50.9 ± 21.2         | 0.24 |
| LDL cholesterol (mg/dL)   | 111.6 ± 32.8      | 110.6 ± 32.4        | 127.1 ± 37.5        | 0.17 |
| Glucose (mg/dL)           | 117.1 ± 45.8      | 117.6 ± 47.0        | 109.8 ± 19.8        | 0.62 |
| HbA1c (%)                 | 6.5 ± 1.9         | 6.4 ± 1.5           | 6.6 ± 0.7           | 0.52 |
| Serum creatinine (mg/dL)  | 0.90 ± 0.36       | 0.90 ± 0.37         | 0.93 ± 0.22         | 0.85 |
| Hemoglobin (g/dL)         | 13.3 ± 1.5        | 13.4 ± 1.5          | 12.3 ± 1.7          | 0.09 |
| Hypertension (%)          | 43.1              | 43.0                | 44.4                | 0.93 |
| Hypercholesterolemia (%)  | 68.2              | 68.6                | 62.5                | 0.72 |
| Diabetes mellitus (%)     | 32.6              | 33.3                | 22.2                | 0.49 |
| Prior MI (%)              | 62.5              | 60.7                | 88.9                | 0.09 |
| Prior heart failure (%)   | 13.2              | 13.3                | 11.1                | 0.85 |
| Prior PCI (%)             | 40.3              | 40.7                | 33.3                | 0.66 |
| Prior CABG (%)            | 8.3               | 8.1                 | 11.1                | 0.76 |

|                       |      |      |      |      |
|-----------------------|------|------|------|------|
| Diuretics (%)         | 17.6 | 18.0 | 11.1 | 0.60 |
| Statins (%)           | 59.9 | 60.2 | 55.6 | 0.79 |
| ACEIs or ARBs (%)     | 35.2 | 36.1 | 22.2 | 0.40 |
| $\beta$ -blockers (%) | 41.5 | 40.6 | 55.6 | 0.38 |
| CCBs (%)              | 23.9 | 23.3 | 33.3 | 0.50 |

---

Data represent mean  $\pm$  standard deviation or frequency or median and interquartile range (IQR).

\*Events were defined as combined subsequent acute decompensated heart failure and cardiovascular death.

*HDL* high-density lipoprotein, *LDL* low-density lipoprotein, *Hb* hemoglobin, *MI* myocardial infarction, *PCI* percutaneous coronary intervention, *CABG*, coronary artery bypass graft, *BNP* brain natriuretic peptide, *ACEI* angiotensin-converting enzyme inhibitor, *ARB* angiotensin receptor blocker, *CCB* calcium channel blocker

**Supplementary Table S3** Comparisons of clinical characteristics and hemodynamic variables

| Characteristic                       | All patients | Without events* | With events  | P     |
|--------------------------------------|--------------|-----------------|--------------|-------|
| Number                               | 144          | 137             | 7            |       |
| Male/female                          | 116/28       | 111/26          | 5/2          | 0.53  |
| Age (years)                          | 65.8 ± 8.7   | 65.6 ± 8.6      | 68.3 ± 11.08 | 0.43  |
| Height (cm)                          | 162.3 ± 8.1  | 162.2 ± 8.1     | 163.2 ± 8.5  | 0.75  |
| Weight (kg)                          | 63.9 ± 10.4  | 64.0 ± 10.2     | 63.1 ± 6.5   | 0.83  |
| Body surface area (m <sup>2</sup> )  | 1.71 ± 0.16  | 1.71 ± 0.17     | 1.70 ± 0.13  | 0.92  |
| Body mass index (kg/m <sup>2</sup> ) | 24.2 ± 3.3   | 24.3 ± 3.3      | 23.7 ± 2.3   | 0.67  |
| Heart rate (beats/min)               | 66.8 ± 10.7  | 66.6 ± 10.5     | 71.0 ± 13.9  | 0.29  |
| Mean blood pressure (mm Hg)          | 93.9 ± 14.1  | 93.8 ± 14.4     | 94.9 ± 13.9  | 0.85  |
| LVEF (%)                             | 62.4 ± 12.4  | 62.7 ± 12.5     | 55.7 ± 8.2   | 0.14  |
| LV end-diastolic pressure (mm Hg)    | 14.1 ± 5.0   | 14.0 ± 4.8      | 16.4 ± 7.6   | 0.21  |
| Tw (ms)                              | 46.0 ± 9.1   | 45.8 ± 9.0      | 50.8 ± 9.9   | 0.15  |
| Tp (ms)                              | 78.0 ± 27.0  | 76.6 ± 25.6     | 105.4 ± 39.4 | 0.006 |
| Lack of IS (%)                       | 25           | 22.6            | 71.4         | 0.004 |

Data represent mean ± standard deviation or frequency.

\*Events were defined as subsequent acute decompensated heart failure.

*LV* left ventricular, *LVEF* left ventricular ejection fraction, *T<sub>w</sub>* left ventricular relaxation time constant calculated by Weiss's method, *T<sub>p</sub>* left ventricular relaxation time constant calculated from phase loop, *IS* inertia stress

**Supplementary Table S4** Comparisons of clinical characteristics, underlying diseases, and medications

| Characteristic            | All patients      | Without events*     | With events          | P    |
|---------------------------|-------------------|---------------------|----------------------|------|
| Total cholesterol (mg/dL) | 187.5 ± 36.4      | 187.0 ± 35.9        | 195.1 ± 47.1         | 0.57 |
| Triglycerides (mg/dL)     | 125 [IQR, 90-189] | 126 [IQR, 91.5-191] | 83.0 [IQR, 74.0-168] | 0.24 |
| HDL cholesterol (mg/dL)   | 45.6 ± 13.1       | 45.5 ± 12.1         | 47.2 ± 13.2          | 0.77 |
| LDL cholesterol (mg/dL)   | 111.6 ± 32.8      | 110.6 ± 32.2        | 132.8 ± 41.5         | 0.11 |
| Glucose (mg/dL)           | 117.1 ± 45.8      | 117.3 ± 46.7        | 112.0 ± 21.7         | 0.77 |
| HbA1c (%)                 | 6.5 ± 1.9         | 6.4 ± 1.5           | 6.6 ± 0.7            | 0.77 |
| Serum creatinine (mg/dL)  | 0.90 ± 0.36       | 0.90 ± 0.37         | 0.84 ± 0.15          | 0.67 |
| Hemoglobin (g/dL)         | 13.3 ± 1.5        | 13.4 ± 1.5          | 11.9 ± 1.6           | 0.04 |
| Hypertension (%)          | 43.1              | 43.1                | 42.9                 | 0.99 |
| Hypercholesterolemia (%)  | 68.2              | 68.3                | 66.7                 | 0.93 |
| Diabetes mellitus (%)     | 32.6              | 32.8                | 28.6                 | 0.81 |
| Prior MI (%)              | 62.5              | 61.3                | 85.7                 | 0.19 |
| Prior heart failure (%)   | 13.2              | 13.1                | 14.3                 | 0.93 |
| Prior PCI (%)             | 40.3              | 40.9                | 28.6                 | 0.52 |
| Prior CABG (%)            | 8.3               | 8.0                 | 14.3                 | 0.56 |

|                       |      |      |      |      |
|-----------------------|------|------|------|------|
| Diuretics (%)         | 17.6 | 18.5 | 0    | 0.21 |
| Statins (%)           | 59.9 | 60.0 | 57.1 | 0.88 |
| ACEIs or ARBs (%)     | 35.2 | 36.3 | 14.3 | 0.24 |
| $\beta$ -blockers (%) | 41.5 | 41.5 | 42.9 | 0.94 |
| CCBs (%)              | 23.9 | 23.7 | 28.6 | 0.77 |

---

Data represent mean  $\pm$  standard deviation or frequency or median and interquartile range (IQR).

\*Events were defined as subsequent acute decompensated heart failure.

*HDL* high-density lipoprotein, *LDL* low-density lipoprotein, *Hb* hemoglobin, *MI* myocardial infarction, *PCI* percutaneous coronary intervention, *CABG*, coronary artery bypass graft, *BNP* brain natriuretic peptide, *ACEI* angiotensin-converting enzyme inhibitor, *ARB* angiotensin receptor blocker, *CCB* calcium channel blocker
